# Supplementary material
Source: ML conference proceedings conference paper supplement (https://proceedings.neurips.cc/paper_files/paper/2022/hash/3a33ae4d634b49b0866b4142a1f82a2f-Abstract.html)
Supplement: Supplementary file 1 [file 3a33ae4d634b49b0866b4142a1f82a2f-Supplemental-Conference.zip]

Archive with 2 entries (2 files):
- 7235_demo.mp4
- _NIPS_2022__ShapeCrafter (2).pdf
